# Supplementary material for: Lung Mycobiota α-Diversity Is Linked to Severity in Critically Ill Patients with Acute Exacerbation of Chronic Obstructive Pulmonary Disease
Source: PubMed Central journal article supplement (PMC10100765; doi:10.1128/spectrum.05062-22), 2023-03-28
Supplement: spectrum.05062-22-s0001.pdf [file spectrum.05062-22-s0001.pdf]

**Supplemental Figure 1.** Non metric Bray-curtis analysis of  $\beta$ -diversity of the ITS2 sequencing run. Mock: mock community. TN: negative control from extraction step. TN PCR: negative control from amplification PCR step.

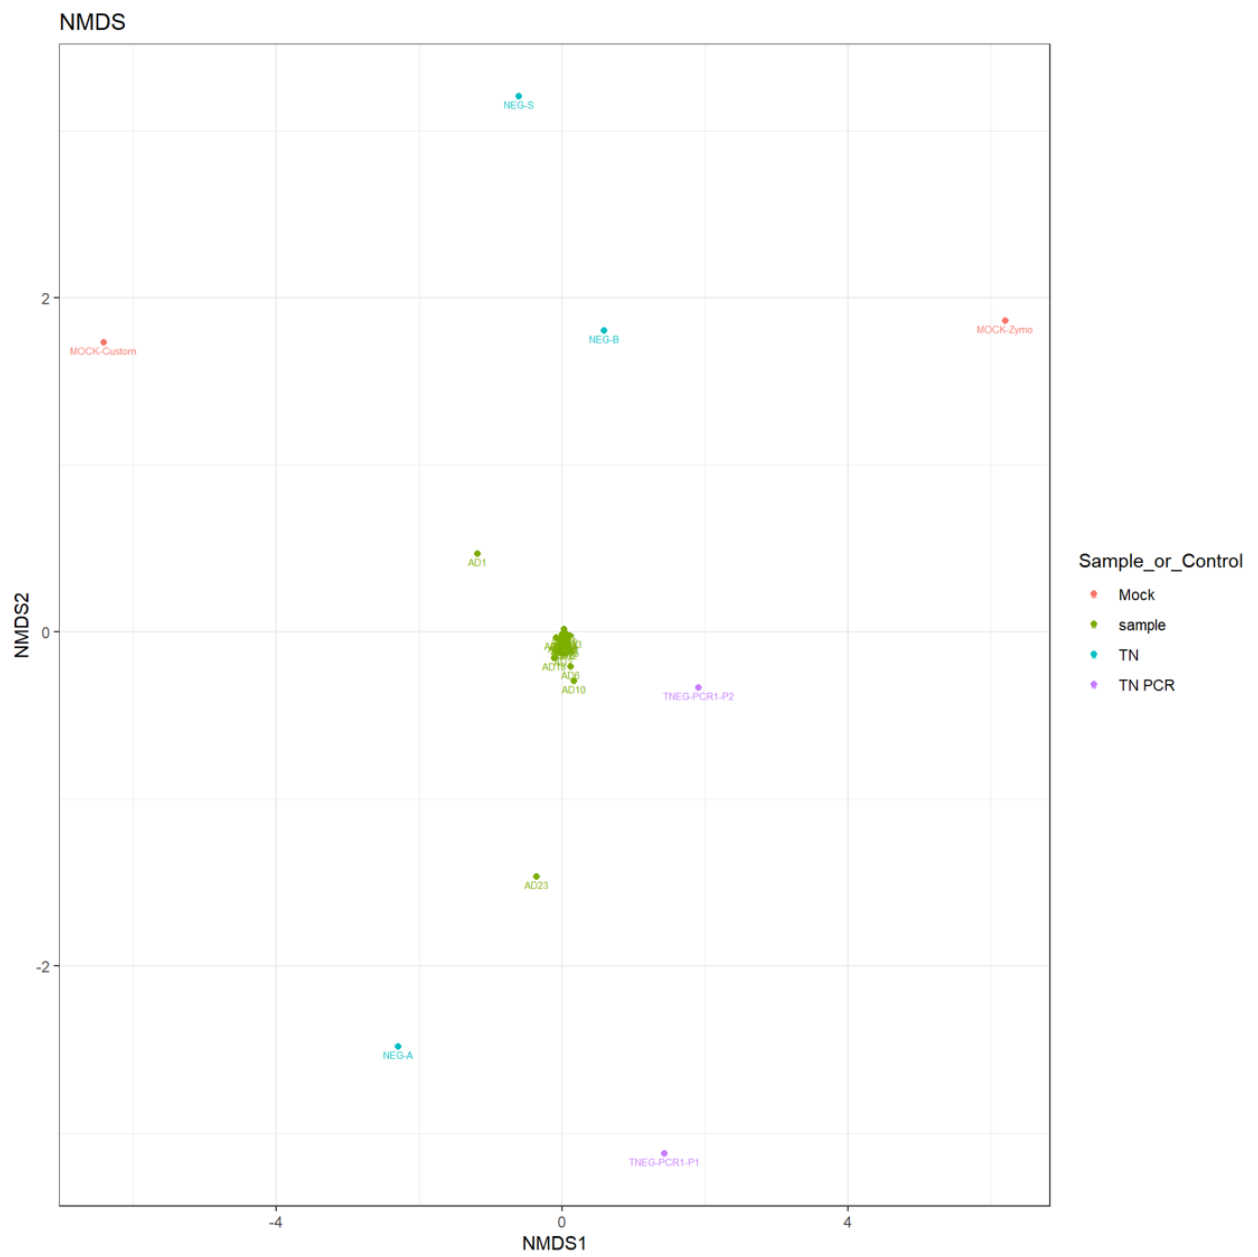

**Supplemental Figure 2.** Non metric Bray-curtis analysis of  $\beta$ -diversity of the V3-V4 sequencing run. Mock: mock community. TN: negative control from extraction step. TN PCR: negative control from amplification PCR step. AD5, AD9, AD22 and AD32 were excluded from further analyses.

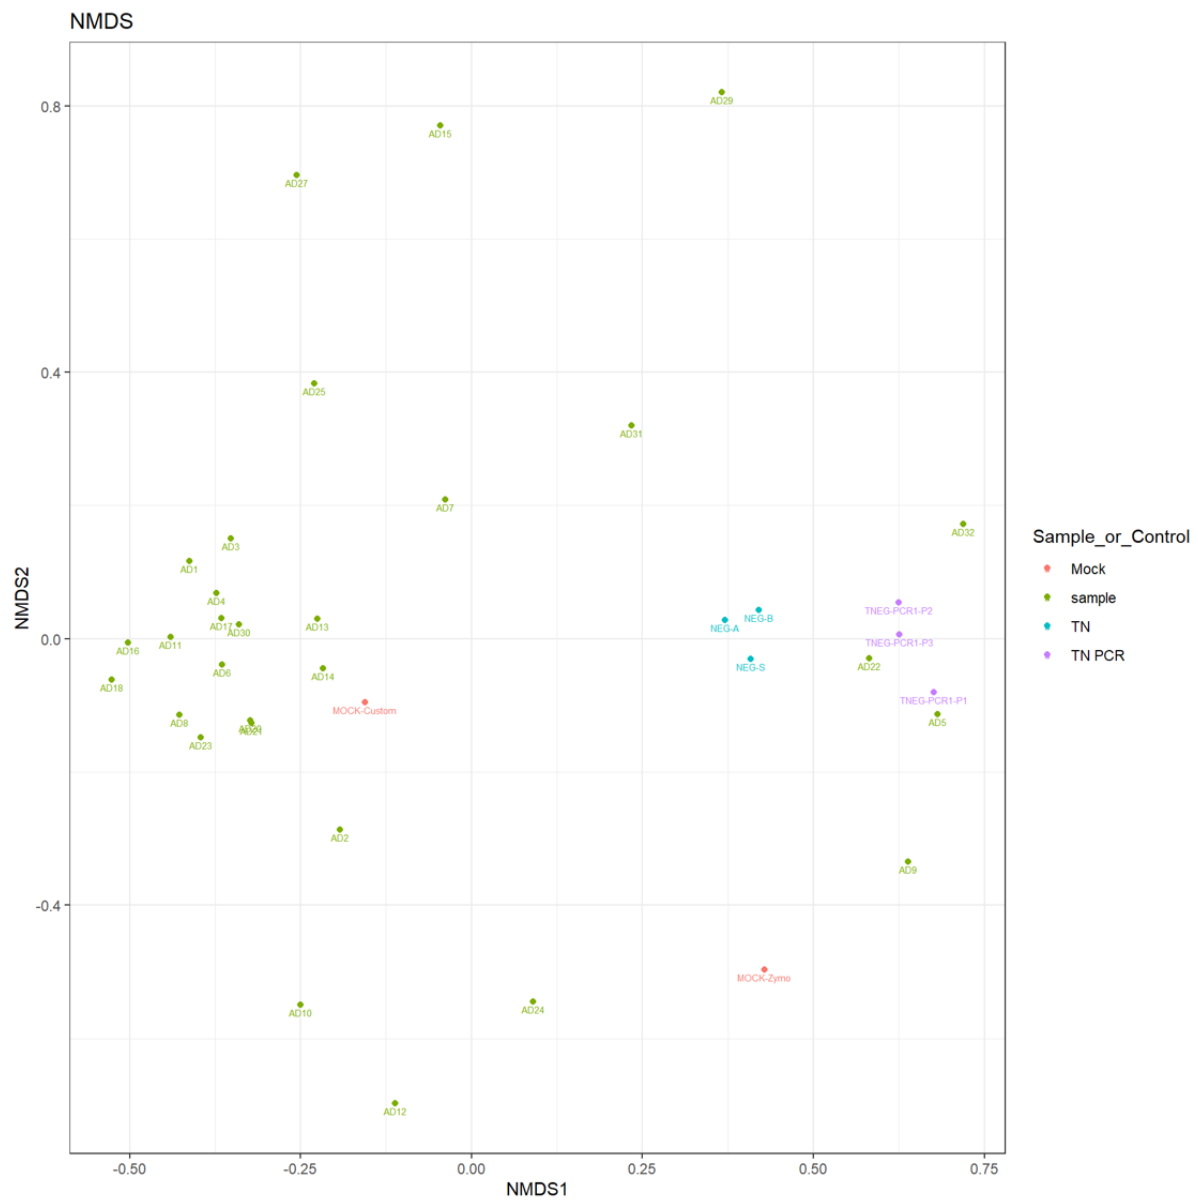

**Supplemental Table 1.** Number of ITS 2 reads before and after filtration.

| sample_name .phylo. | Initial number of reads | Filtered reads | proportion | Number of reads after filtration |
|---------------------|-------------------------|----------------|------------|----------------------------------|
| AD1                 | 25992                   | 25652          | 98.691905  | 340                              |
| AD10                | 16998                   | 15274          | 89.857630  | 1724                             |
| AD11                | 34967                   | 34816          | 99.568164  | 151                              |
| AD12                | 22339                   | 22231          | 99.516541  | 108                              |
| AD13                | 6949                    | 6935           | 99.798532  | 14                               |
| AD14                | 18341                   | 18216          | 99.318467  | 125                              |
| AD15                | 47910                   | 47805          | 99.780839  | 105                              |
| AD16                | 24366                   | 23958          | 98.325536  | 408                              |
| AD17                | 48520                   | 48270          | 99.484749  | 250                              |
| AD18                | 65413                   | 64680          | 98.879428  | 733                              |
| AD19                | 57233                   | 56528          | 98.768193  | 705                              |
| AD2                 | 44127                   | 41598          | 94.268815  | 2529                             |
| AD20                | 34725                   | 34645          | 99.769618  | 80                               |
| AD21                | 28085                   | 28051          | 99.878939  | 34                               |
| AD22                | 13456                   | 12876          | 95.689655  | 580                              |
| AD23                | 18134                   | 3524           | 19.433109  | 14610                            |
| AD24                | 37321                   | 37094          | 99.391763  | 227                              |
| AD25                | 50444                   | 50059          | 99.236777  | 385                              |
| AD26                | 61296                   | 60833          | 99.244648  | 463                              |
| AD27                | 46930                   | 45715          | 97.411038  | 1215                             |
| AD28                | 37894                   | 37222          | 98.226632  | 672                              |
| AD29                | 45112                   | 44856          | 99.432524  | 256                              |
| AD3                 | 41115                   | 40638          | 98.839839  | 477                              |
| AD30                | 36280                   | 35008          | 96.493936  | 1272                             |
| AD31                | 46279                   | 46200          | 99.829296  | 79                               |
| AD4                 | 26507                   | 26369          | 99.479383  | 138                              |
| AD5                 | 33582                   | 32984          | 98.219284  | 598                              |

| <b>sample_name<br/>.phylo.</b> | <b>Initial number of<br/>reads</b> | <b>Filtered reads</b> | <b>proportion</b> | <b>Number of reads after<br/>filtration</b> |
|--------------------------------|------------------------------------|-----------------------|-------------------|---------------------------------------------|
| AD6                            | 39509                              | 37631                 | 95.246653         | 1878                                        |
| AD7                            | 44785                              | 44141                 | 98.562018         | 644                                         |
| AD8                            | 34596                              | 34531                 | 99.812117         | 65                                          |
| MOCK-Custom                    | 8327                               | 0                     | 0.000000          | 8327                                        |
| MOCK-Zymo                      | 27344                              | 455                   | 1.663985          | 26889                                       |
| NEG-A                          | 356                                | 117                   | 32.865169         | 239                                         |
| NEG-B                          | 198                                | 169                   | 85.353535         | 29                                          |
| NEG-S                          | 1738                               | 314                   | 18.066743         | 1424                                        |
| TNEG-PCR1-P1                   | 9                                  | 9                     | 100.000000        | 0                                           |
| TNEG-PCR1-P2                   | 66                                 | 23                    | 34.848485         | 43                                          |

**Supplemental Figure 3.** Rarefaction curves for ITS2 sequencing

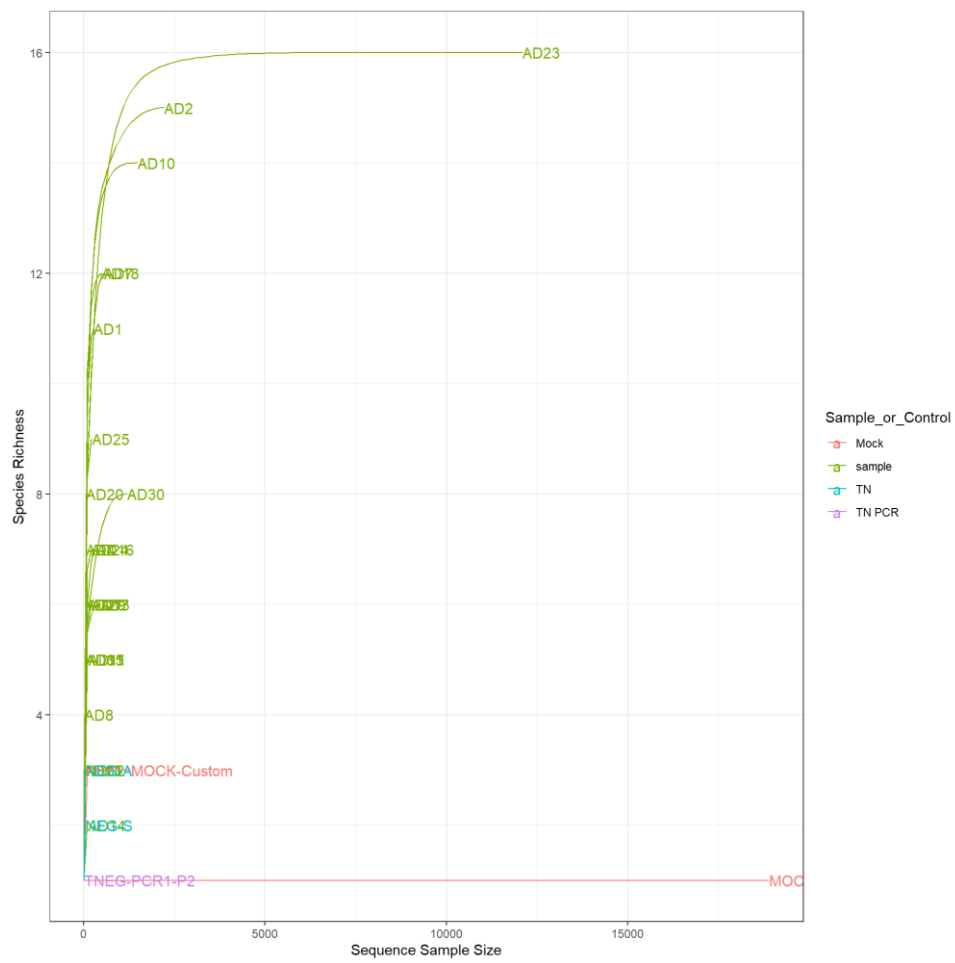

TN: negative control from the extraction step. TN PCR: negative control from the amplification PCR step.

**Supplemental Figure 4.** Comparison of lung mycobiota between severe AECOPD patients who received antimicrobial therapy within the previous month and those who did not. A. Boxplot of estimated  $\alpha$ -diversity by Shannon index. B. Boxplot of estimated  $\alpha$ -diversity by Simpson index. C. Boxplot of estimated  $\alpha$ -diversity by evenness. D. Non-metric Bray-curtis analysis of  $\beta$ -diversity. Threshold for statistical significance:  $p=0.05$ . atb: systemic antibiotics within the previous month.

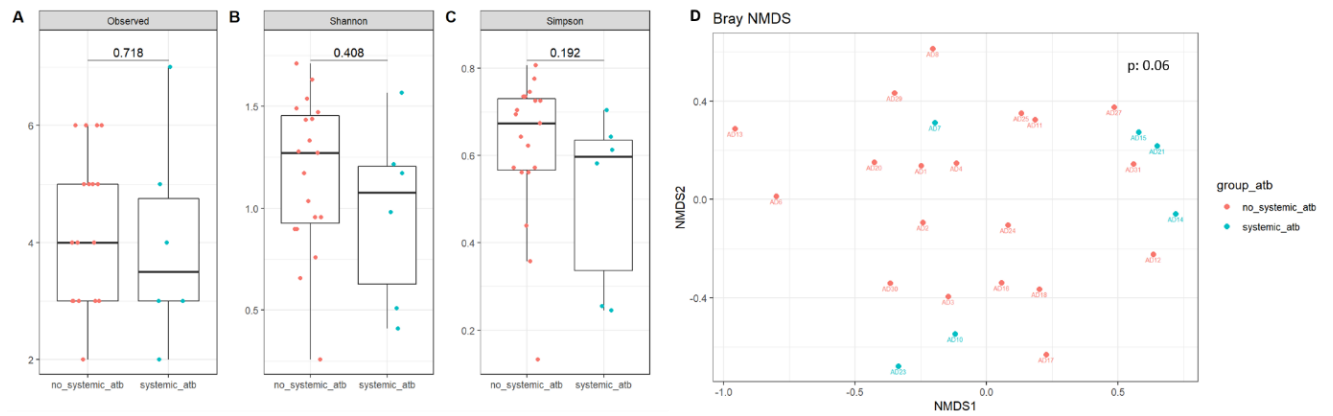

**Supplemental Figure 5.** Comparison of lung bacteriobiota between severe AECOPD patients who received antimicrobial therapy within the previous month and those who did not. A. Boxplot of estimated  $\alpha$ -diversity by Shannon index. B. Boxplot of estimated  $\alpha$ -diversity by Simpson index. C. Boxplot of estimated  $\alpha$ -diversity by evenness. D. Non-metric Bray-curtis analysis of  $\beta$ -diversity. Threshold for statistical significance:  $p=0.05$ . atb: systemic antibiotics within the previous month.

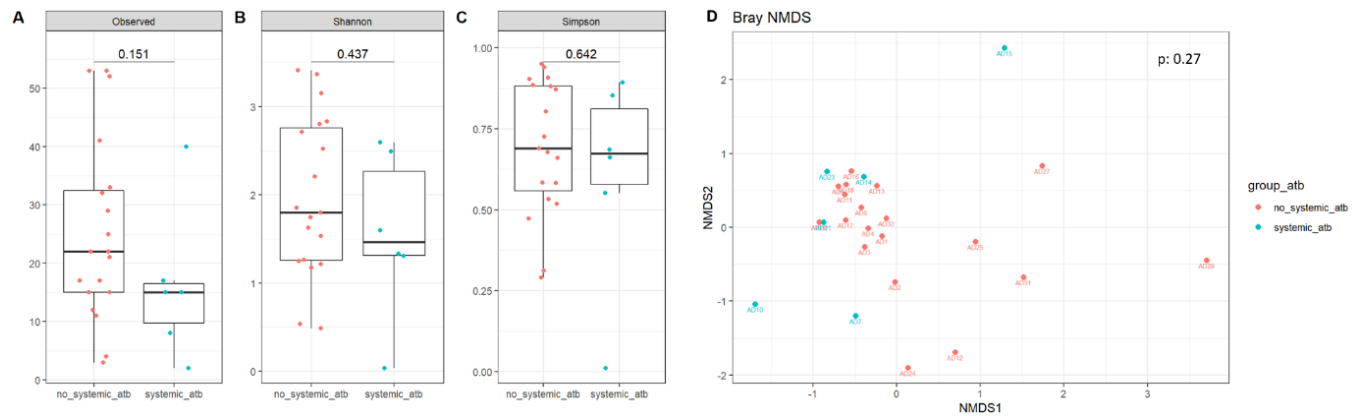

**Supplemental Figure 6.** Comparison of lung mycobiota between severe AECOPD patients who receive long-term inhaled corticosteroids therapy and those who do not. A. Boxplot of estimated  $\alpha$ -diversity by Shannon index. B. Boxplot of estimated  $\alpha$ -diversity by Simpson index. C. Boxplot of estimated  $\alpha$ -diversity by evenness. D. Non-metric Bray-curtis analysis of  $\beta$ -diversity. Threshold for statistical significance:  $p=0.05$ . icortic: long-term inhaled corticosteroids therapy

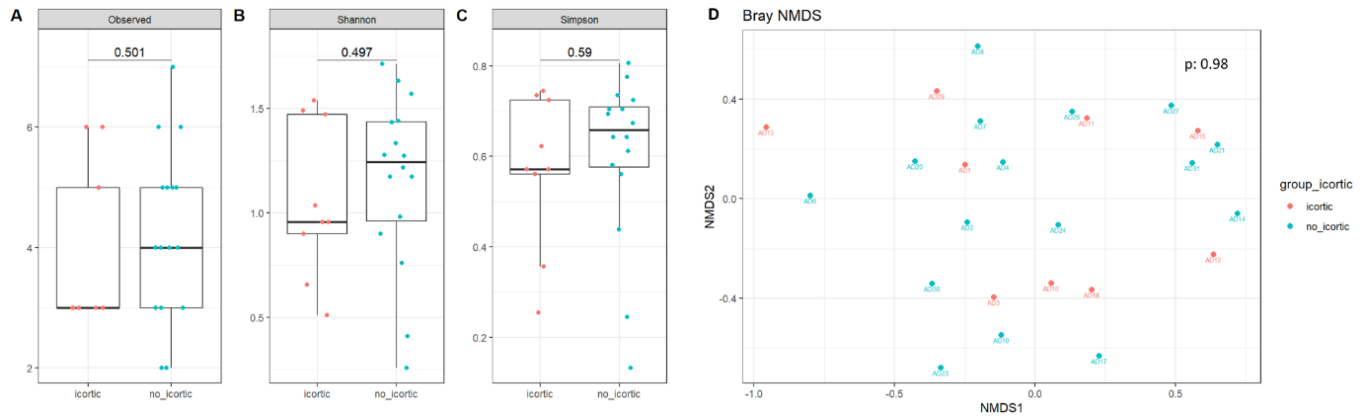



**Supplemental Figure 7.** Comparison of lung microbiota between severe AECOPD patients who receive long-term inhaled corticosteroids therapy and those who do not. A. Boxplot of estimated  $\alpha$ -diversity by Shannon index. B. Boxplot of estimated  $\alpha$ -diversity by Simpson index. C. Boxplot of estimated  $\alpha$ -diversity by evenness. D. Non-metric Bray-curtis analysis of  $\beta$ -diversity. Threshold for statistical significance:  $p=0.05$ . icortic: long-term inhaled corticosteroids therapy

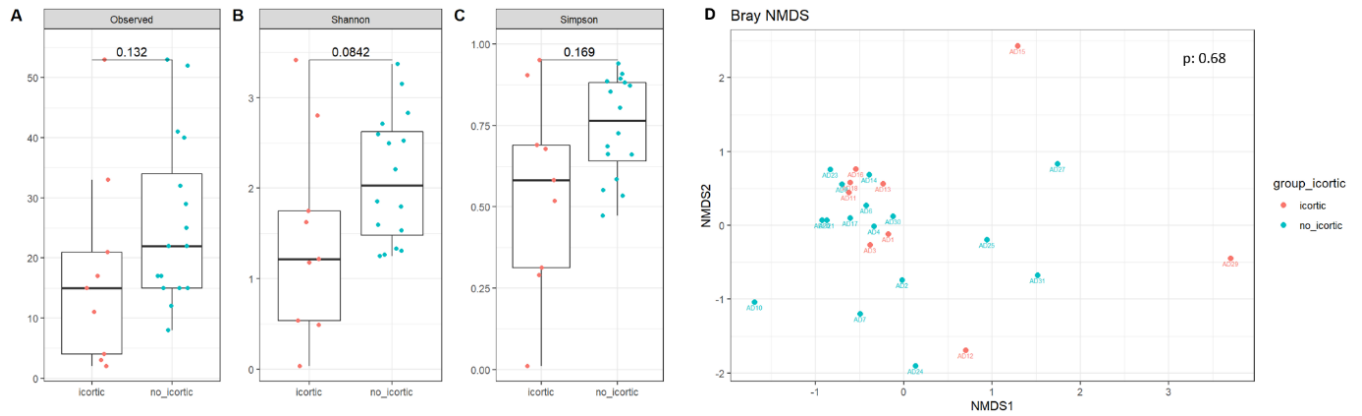

**Supplemental Figure 8.** Comparison of lung mycobiota between severe AECOPD patients who received systemic corticosteroids therapy within the previous month and those who did not. A. Boxplot of estimated  $\alpha$ -diversity by Shannon index. B. Boxplot of estimated  $\alpha$ -diversity by Simpson index. C. Boxplot of estimated  $\alpha$ -diversity by evenness. D. Non-metric Bray-curtis analysis of  $\beta$ -diversity. Threshold for statistical significance:  $p=0.05$ . corticotherapy: corticosteroids therapy within the previous month.

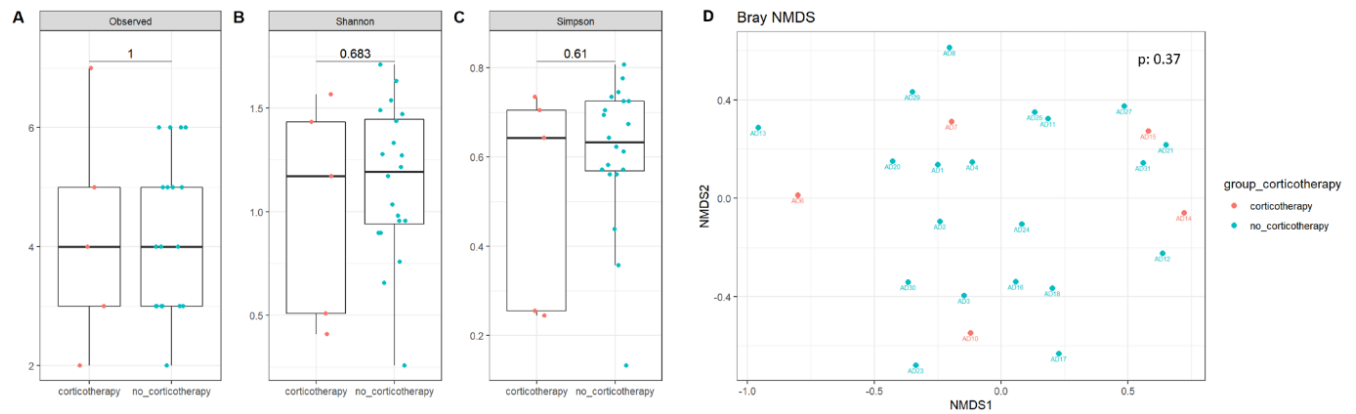

**Supplemental Figure 9.** Comparison of lung microbiota between severe AECOPD patients who received systemic corticosteroids therapy within the previous month and those who did not. A. Boxplot of estimated  $\alpha$ -diversity by Shannon index. B. Boxplot of estimated  $\alpha$ -diversity by Simpson index. C. Boxplot of estimated  $\alpha$ -diversity by evenness. D. Non-metric Bray-curtis analysis of  $\beta$ -diversity. Threshold for statistical significance:  $p=0.05$ . corticotherapy: corticosteroids therapy within the previous month.

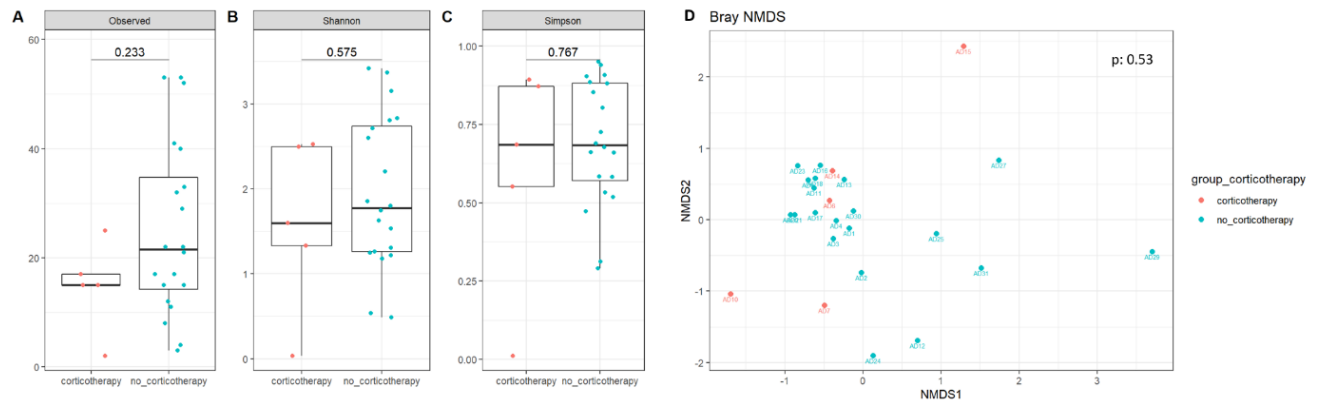

**Supplemental Figure 10.** Lung mycobiota phylum relative abundance.

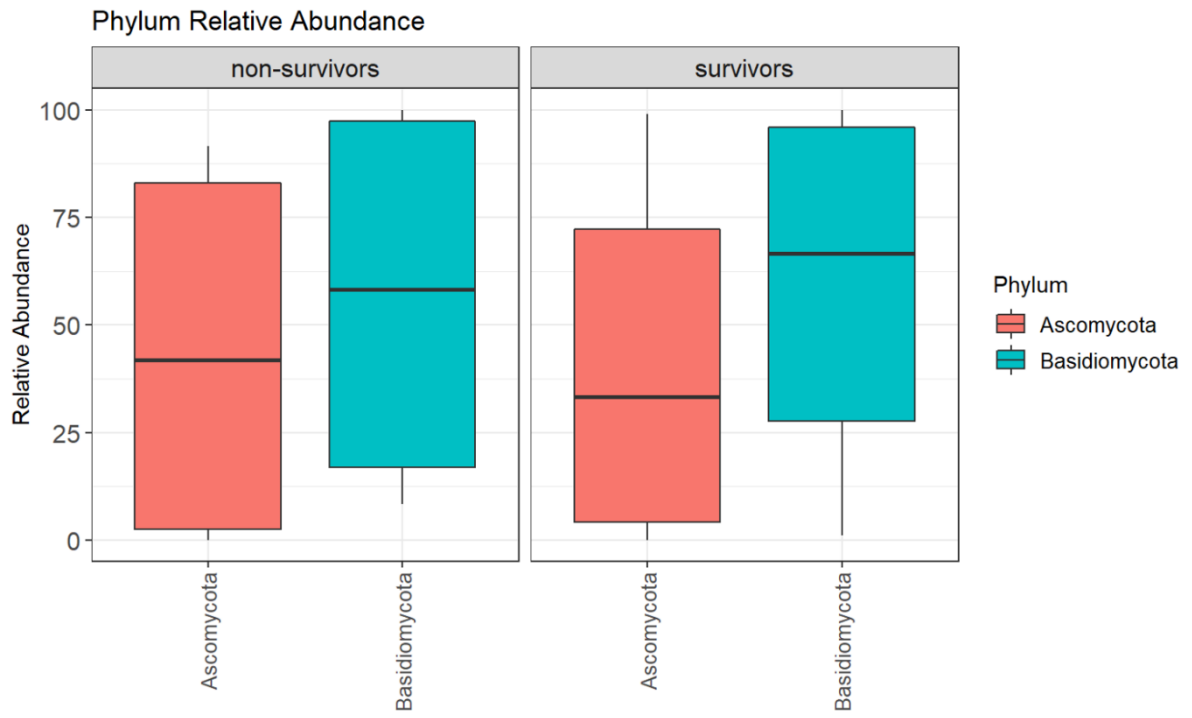

**Supplemental Figure 11.** Lung bacteriobiota phylum relative abundance.

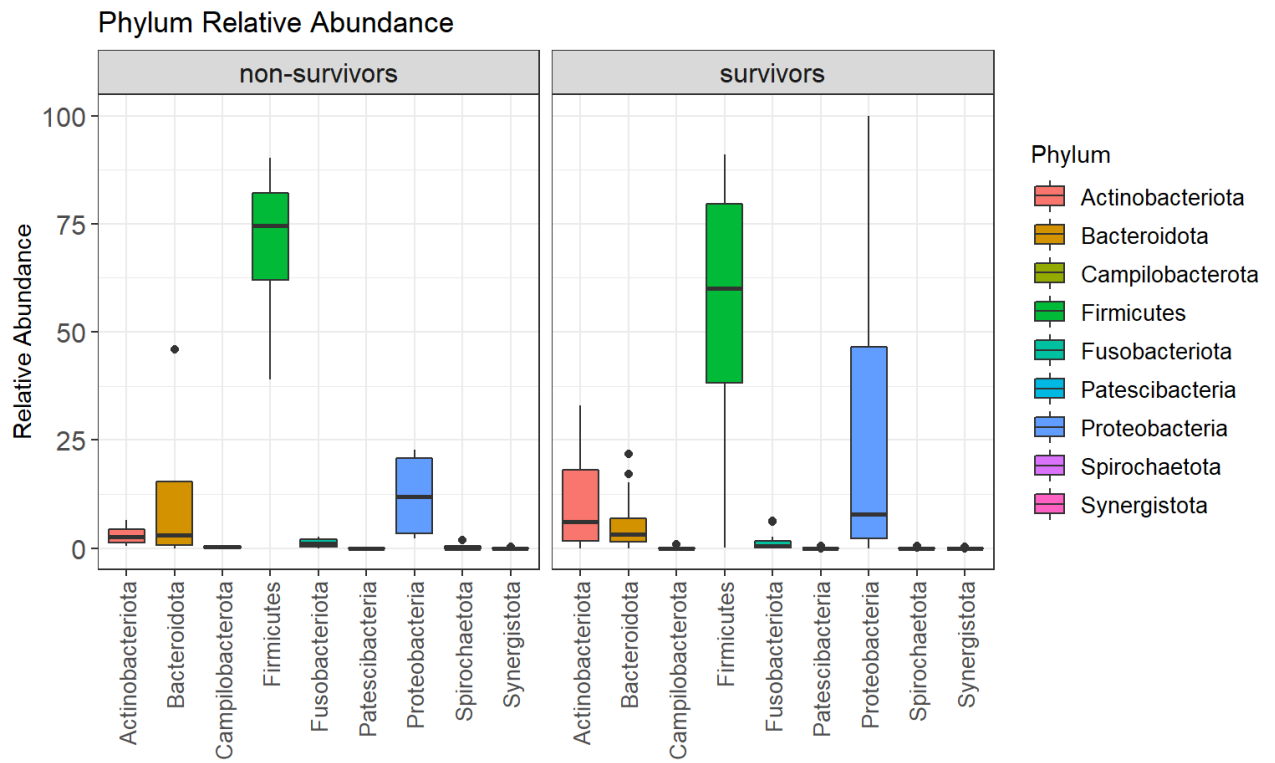

## Mock

### ZymoBIOMICS® Microbial Community Standard

*Listeria monocytogenes* - 12%  
*Pseudomonas aeruginosa* - 12%  
*Bacillus subtilis* - 12%  
*Escherichia coli* - 12%  
*Salmonella enterica* - 12%  
*Lactobacillus fermentum* - 12%  
*Enterococcus faecalis* - 12%  
*Staphylococcus aureus* - 12%  
*Saccharomyces cerevisiae* - 2%  
*Cryptococcus neoformans* - 2%

### r16SRNA coding gene home-made mock microbial community standards

*Streptococcus mitis* (400 µL)  
*Streptococcus oralis* (400 µL)  
*Pseudomonas aeruginosa* (200 µL)  
*Stenotrophomonas maltophilia* (200 µL)  
*Staphylococcus epidermidis* (400 µL)  
*Staphylococcus aureus* (400 µL)  
*Acinetobacter baumannii* (400 µL)  
*Klebsiella pneumoniae* (200 µL)  
*Proteus mirabilis* (200 µL)  
*Serratia marcescens* (400 µL)  
*Lactobacillus spp.* (200 µL)  
*Escherichia coli* (ATCC 25922) (200 µL)  
*Enterobacter cloacae* (200µL)  
*Enterococcus faecalis* (ATCC 29212) (400 µL)

### ITS2 coding gene home-made mock microbial community standards

*Scedosporium apiospermum* (*Pseudallescheria boydii*) (200 µL)  
*Mucor circillenioides* (400 µL)  
*Candida lusitanae* (*Clavispora lusitanae*) (400 µL)  
*Scedosporium aurantiacum* (400 µL)  
*Lomentospora prolificans* (*Scedosporium prolificans*) (200 µL)  
*Aspergillus fumigatus* (400 µL)  
*Aspergillus flavus* (200 µL)  
*Aspergillus terreus* (200 µL)  
*Penicillium griseofulvum* (200 µL)  
*Fusarium solani* (200 µL)  
*Candida dubliniensis* (400 µL)  
*Candida albicans* (ATCC 5314) (400 µL)  
*Rhodotorula mucilaginosa* (400 µL)  
*Exophiala dermatitidis* (400 µL)

## Script for 16S RNA coding gene assignation

---

```
title: "Assignment 16S"  
author: "Renaud Prevel & Raphael Enaud"  
date: `r format(Sys.time(), "%d %m %Y")`
```

header-includes:

```
- \usepackage{color, fancyvrb}
```

output:

```
rmdformats::readthedown:
```

```
highlight: kate
```

```
numbersections : yes
```

```
html_document:
```

```
fig_height: 7
```

```
fig_width: 10
```

---

```
``{r knitrinit, include=FALSE, warning=FALSE, message=FALSE, cache=FALSE}
```

```
library(rstudioapi)
```

```
setwd(dirname(rstudioapi::getActiveDocumentContext())$path))
```

```
load("./assignment.rda")
```

```
library(knitr)
```

```
library(rmdformats)
```

```
library("kableExtra")
```

```
library(DESeq2)
```

```
library("ggplot2")
```

```
library("readxl")
```

```
library("dplyr")
```

```
library(knitr)
```

```
library(rmdformats)
```

```
library(psy)
```

```
library(Rcpp)
```

```
library(nnet)
```

```
library(dplyr)
```

```
library(ggplot2)
```

```
library(psy)
```

```
library(prettyR)
```

```
library(corrplot)
```

```
library(readr)
```

```
library(questionr)
```

```
library(finalfit)
```

```
library(labelled)
```

```
library("dada2")
```

```
library(ShortRead)
```

```
library(Biostrings)
```

```
library(DECIPHER)
```

```
library("plyr")
```

```
theme_set(theme_bw())
```

```
library(phyloseq)
library(BiocStyle)
library(ape)
library(tidyr)
library(broom)
library(dplyr)
library(Hmisc)
library(microbiome)
library(picante)
library(plyr)
library(reshape2)
library(doBy)
library(RVAideMemoire)
library(vegan)
library(heatmap.plus)
library(RColorBrewer)
library(gplots)
library(kableExtra)
library(gridExtra)
library(knitr)
library(microbiomeSeq)
library(adespatial)
library(ggpubr)
library(devtools)
library(yingtools2)
library("microDecon")
```

```
...
```

```
``{r, include=FALSE}
```

```
# Creation of the phyloseq object
```

```
samdf<- read_xlsx("./Sample Data.xlsx")
```

```
samples_df <- sample_data(samdf)
```

```
rownames(samples_df) <- samples_df$sample
```

```
samples_df$Groupe <- factor(samples_df$Groupe)
```

```
samples_df$Sample_or_Control <- factor(samples_df$Sample_or_Control)
```

```
phylo <- phyloseq(otu_table(seqtab.nochim, taxa_are_rows=FALSE),
  sample_data(samples_df),
  tax_table(taxa))
```

```
dna <- Biostrings::DNASTringSet(taxa_names(phylo))
```

```
names(dna) <- taxa_names(phylo)
```

```
phylo <- merge_phyloseq(phylo, dna)
```

```
taxa_names(phylo) <- paste0("ASV", seq(ntaxa(phylo)))
```



```

phylo
...

# Check the number of reads

```{r, echo=FALSE}
df <- as.data.frame(sample_data(phylo)) # Put sample_data into a ggplot-friendly data.frame
df$LibrarySize <- sample_sums(phylo)
df <- df[order(df$LibrarySize),]
df$Index <- seq(nrow(df))
ggplot(data=df, aes(x=Index, y=LibrarySize, color=Sample_or_Control, label = sample)) + geom_point()

kableExtra::kable(sort(sample_sums(phylo))) %>%
  kable_styling() %>%
  scroll_box(width = "100%", height = "600px")
...

# Selection of bacterial ASVs
```{r, echo=FALSE}
phylo = subset_taxa(phylo, Kingdom=="Bacteria")
phylo

#Removal of phylum with a single taxa
phylo <- subset_taxa(phylo, !is.na(Phylum) & !Phylum %in%
c("", "Bdellovibrionota", "Chloroflexi", "Deinococcota", "<NA>", "NA"))

phylo
...

# Filtering of minority ASVs

```{r, echo=FALSE}

# ASV present in less than 3 samples
condition <- function(x) { sum(x > 0) >= 2 }
taxaToKeep <- filter_taxa(phylo, condition)
phylo <- prune_taxa(taxaToKeep, phylo)
phylo = prune_samples(names(which(sample_sums(phylo) >= 1)), phylo)
phylo = prune_taxa(names(which(taxa_sums(phylo) >= 1)), phylo)
phylo
...

# Rarefaction curves
```{r, include=FALSE, warning=FALSE, message=FALSE, cache=FALSE, fig.width = 10, fig.height= 10}

library(vegan)

```

```

library(ggplot2)
library("ranacapa")
phylo = prune_samples(names(which(sample_sums(phylo) >= 1)), phylo)
rarefactioncurves = ggrare(phylo, step = 100, label = "sample", color = "Sample_or_Control",se =
FALSE)
...

``{r, echo=FALSE, warning=FALSE, message=FALSE, cache=FALSE, fig.width = 10, fig.height= 10}
rarefactioncurves
...

# Beta diversity

Measurement of Beta Diversity by Bray Curits
## MDS representation (multi-dimensional scaling)

``{r, include=FALSE, warning=FALSE, message=FALSE, cache=FALSE, fig.width = 10, fig.height= 10}

# Transform data to proportions as appropriate for Bray-Curtis distances
ps.prop <- transform_sample_counts(phylo, function(otu) otu/sum(otu))
ord.nmnds.bray <- ordinate(ps.prop, method="MDS", distance="bray")

...

``{r, echo=FALSE, warning=FALSE, message=FALSE, cache=FALSE, fig.width = 10, fig.height= 10}
plot_ordination(ps.prop, ord.nmnds.bray, type="samples", label = "sample", color =
"Sample_or_Control", title="MDS")

...

## Representation NMDS (Non-metric multi-dimensional scaling)
``{r, include=FALSE, warning=FALSE, message=FALSE, cache=FALSE, fig.width = 10, fig.height= 10}
ord.nmnds.bray <- ordinate(ps.prop, method="NMDS", distance="bray")

...

``{r, echo=FALSE, warning=FALSE, message=FALSE, cache=FALSE, fig.width = 10, fig.height= 10}
plot_ordination(ps.prop, ord.nmnds.bray, type="samples", label = "sample", color =
"Sample_or_Control",title="NMDS")

...

# Beta diversity tree (with Bray Curtis dissimilarity index)
``{r, include=FALSE, warning=FALSE, message=FALSE, cache=FALSE}
library("ape")
random_tree = rtree(ntaxa(phylo), rooted=TRUE, tip.label=taxa_names(phylo))

phylo1 = merge_phyloseq(phylo,random_tree)
phylo1

```

```

# Dissimilarity measurement with Bray Cutris
GPUF <- round(distance(phylo1,"bray"),3)
...

```{r, echo=FALSE, warning=FALSE, message=FALSE, cache=FALSE, fig.width = 7, fig.height= 26}

# Creating a tree
## Manually define color-shading vector based on sample type.
colorScale <- rainbow(length(levels(getVariable(phylo1, "Sample_or_Control"))))
cols <- colorScale[getVariable(phylo1, "Sample_or_Control")]
GP.tip.labels <- as(getVariable(phylo1, "sample"), "character")
GP.hclust <- hclust(GPUF, method = "average")

plot(as.phylo(GP.hclust), show.tip.label = TRUE, tip.color = "white")
tiplabels(GP.tip.labels, col = cols, frame = "none",adj = -0.05,cex = 0.7)
...

# Removal of negative controls and Mock

```{r, echo=FALSE, warning=FALSE, message=FALSE, cache=FALSE}
phylo <- subset_samples(phylo, Sample_or_Control == "sample")
phylo = prune_taxa(names(which(taxa_sums(phylo) >= 1)), phylo)
phylo
...

# Resume of the final dataset

```{r, echo=FALSE, warning=FALSE, message=FALSE, cache=FALSE}
summarize_phyloseq(phylo)
...

# saving the global environment

```{r, echo=FALSE, warning=FALSE, message=FALSE, cache=FALSE}
save(phylo, list,file="Phylo pre processed.rda")
...

```

## Script for ITS2 coding gene assignation

---

```
title: "ITS Assignment"  
author: "Renaud Prevel & Raphael Enaud"  
date: `r format(Sys.time(), "%d %m %Y")`
```

header-includes:

```
- \usepackage{color, fancyvrb}
```

output:

```
rmdformats::readthedown:
```

```
highlight: kate
```

```
numbersections : yes
```

```
html_document:
```

```
fig_height: 7
```

```
fig_width: 10
```

---

```
``{r knitrinit, include=FALSE, warning=FALSE, message=FALSE, cache=TRUE}
```

```
# In "path", create a folder "Fastq" with the sequences R1 and R2.
```

```
library(knitr)  
library(rmdformats)  
library("kableExtra")  
library(DESeq2)  
library("ggplot2")  
library("readxl")  
library("dplyr")  
library(knitr)  
library(rmdformats)  
library("kableExtra")  
library(DESeq2)  
library(psy)  
library(Rcpp)  
library(nnet)  
library(dplyr)  
library(ggplot2)  
library(psy)  
library(prettyR)  
library(corrplot)  
library(readr)  
library(questionr)  
library(finalfit)  
library(labelled)  
library("dada2")  
library(ShortRead)  
library(Biostrings)  
library(DECIPHER)  
library("plyr")
```

```
library("phyloseq")
library("ranacapa")
theme_set(theme_bw())
```

```
library(rstudioapi)
setwd(dirname(rstudioapi::getActiveDocumentContext()$path))
path <- file.path(".")
input <- list.dirs(path, full.names = F, recursive = F)
```

```
qual <- "./quality/"
outp <- "./output/"
fastq <- "./Fastq"
R1 <- "./R1"
```

```
fnFs <- sort(list.files(fastq, pattern = "_R1_001.fastq.gz", full.names = TRUE))
fnRs <- sort(list.files(fastq, pattern = "_R2_001.fastq.gz", full.names = TRUE))
```

```
## ITS2 Primers (ITS7F / 3271R):
FWD <- "GTGARTCATCGAATCTTT"
REV <- "GATATGCTTAAGTTCAGCGGGT"
...

```

```
```r, include=FALSE, warning=FALSE, message=FALSE, cache=FALSE}
```

```
# Checking the presence and orientation of primers
```

```
allOrients <- function(primer) {
  # Create all orientations of the input sequence
  require(Biostrings)
  dna <- DNASTring(primer) # The Biostrings works w/ DNASTring objects rather than character vectors
  orients <- c(Forward = dna, Complement = Biostrings::complement(dna), Reverse = reverse(dna),
              RevComp = reverseComplement(dna))
  return(sapply(orients, toString)) # Convert back to character vector
}
FWD.orients <- allOrients(FWD)
REV.orients <- allOrients(REV)
FWD.orients
REV.orients
```

```
# Pre filtration
```

```
fnFs.filtN <- file.path(fastq, "filtN", basename(fnFs)) # Put N-filtered files in filtN/ subdirectory
fnRs.filtN <- file.path(fastq, "filtN", basename(fnRs))
out <- filterAndTrim(fnFs, fnFs.filtN, fnRs, fnRs.filtN, maxN = 0, multithread = TRUE)
```

```
primerHits <- function(primer, fn) {
  # Counts number of reads in which the primer is found
  nhits <- vcountPattern(primer, sread(readFastq(fn)), fixed = FALSE)
  return(sum(nhits > 0))
}
```

...

Number of primers found :

```
``{r, echo=FALSE, warning=FALSE, message=FALSE, cache=FALSE}
rbind(FWD.ForwardReads = sapply(FWD.oriens, primerHits, fn = fnFs.filtN[[1]]),
      FWD.ReverseReads = sapply(FWD.oriens, primerHits, fn = fnRs.filtN[[1]]),
      REV.ForwardReads = sapply(REV.oriens, primerHits, fn = fnFs.filtN[[1]]),
      REV.ReverseReads = sapply(REV.oriens, primerHits, fn = fnRs.filtN[[1]])
...

```

# Primer removal

```
``{r, include=FALSE, warning=FALSE, message=FALSE, cache=FALSE}
```

```
cutadapt <-
"C:/Users/EnaudR/AppData/Local/Packages/PythonSoftwareFoundation.Python.3.9_qbz5n2kfra8p0
/LocalCache/local-packages/Python39/Scripts/cutadapt.exe" # CHANGE ME to location on your
machine

```

```
R1 <- file.path(path, "R1")
if(!dir.exists(R1)) dir.create(R1)
R2 <- file.path(path, "R2")
if(!dir.exists(R2)) dir.create(R2)

```

```
fnFs.cut <- file.path(R1, basename(fnFs))
fnRs.cut <- file.path(R2, basename(fnRs))

```

```
FWD.RC <- dada2:::rc(FWD)
REV.RC <- dada2:::rc(REV)
# Trim FWD and the reverse-complement of REV off of R1 (forward reads)
R1.flags <- paste("-g", FWD, "-a", REV.RC)
# Trim REV and the reverse-complement of FWD off of R2 (reverse reads)
R2.flags <- paste("-G", REV, "-A", FWD.RC)

```

# Run Cutadapt

```
for(i in seq_along(fnFs)) {
  system2(cutadapt, args = c(R1.flags, R2.flags, "-n", 2, # -n 2 required to remove FWD and REV from
reads
                    "-m", 20, "-o", fnFs.cut[i], "-p", fnRs.cut[i], # output files, filtrage des reads au
minimum 20 pb
                    fnFs.filtN[i], fnRs.filtN[i])) # input files
}
...

```

```
``{r, echo=FALSE, warning=FALSE, message=FALSE, cache=FALSE}
rbind(FWD.ForwardReads = sapply(FWD.oriens, primerHits, fn = fnFs.cut[[1]]),
      FWD.ReverseReads = sapply(FWD.oriens, primerHits, fn = fnRs.cut[[1]]),
      REV.ForwardReads = sapply(REV.oriens, primerHits, fn = fnFs.cut[[1]]),
      REV.ReverseReads = sapply(REV.oriens, primerHits, fn = fnRs.cut[[1]])

```

...

```
```{r, include=FALSE, warning=FALSE, message=FALSE, cache=FALSE}
```

```
path <- file.path(".")
```

```
input<-list.dirs(path, full.names = F, recursive = F)
```

```
qual<-"/quality/"
```

```
outp<-"/output/"
```

```
R1 = "/R1"
```

```
write.fasta.dada<-function(dada2, file){
```

```
  seqs<-dada2::getSequences(dada2)
```

```
  hash<-paste0(">",sapply(seqs, openssl::sha1, USE.NAMES = F))
```

```
  write(c(rbind(hash, seqs)),file)
```

```
}
```

```
for (R1 in R1){
```

```
  # List FASTQ files
```

```
  fq <-list.files(file.path(path,"R1"), pattern="_001.fastq.gz")
```

```
  # Extract sample names, assuming filenames have format: SAMPLENAME_XXX.fastq
```

```
  sample.names <- sapply(strsplit(fq, "_"), `[`, 1)
```

```
  # Add the full path
```

```
  fq <- file.path(R1, fq)
```

```
  filt_path <- file.path(qual,"R1") # Place filtered files in subdirectory
```

```
  dir.create(filt_path, recursive = T)
```

```
  # Prepare future filenames
```

```
  filt <- file.path(filt_path, paste0(sample.names, ".filt.fastq.gz"))
```

```
  out.ee <- lapply(1:length(sample.names),function(i) {
```

```
    fastqFilter(fn = fq[i],
```

```
      fout = filt[i],
```

```
      trimLeft = 0,minLen = 100,
```

```
      maxN=0, maxEE = 1, rm.phix=TRUE,
```

```
      compress=TRUE)
```

```
  })
```

```
  # Dereplication
```

```
  derep <- lapply(1:length(sample.names), function(i){
```

```
    derepFastq(filt[i], verbose=TRUE)
```

```
  })
```

```
  names(derep)<-sample.names
```

```
  # Learn errors
```

```
  err <- learnErrors(derep, multithread=3)
```

```
  # Get variants
```

```

dada_obj<-dada(derep, err=err, multithread = 3)
# Create output directory
#outp_rds<-file.path(outp,R1, "RDS")
#dir.create(outp_rds, recursive = T)
#saveRDS(dada_obj, file = paste0(outp_rds,"/",R1,".RDS"), compress = "gzip")

# Produce Variant Table
seqtab<-makeSequenceTable(dada_obj)

# Remove Chimeras
seqtab.nochim <- removeBimeraDenovo(seqtab, verbose=TRUE)

}
```

# List of samples
```{r, echo=FALSE, warning=FALSE, message=FALSE, cache=FALSE}
sample.names
```

# Checking reading quality profiles

```{r, echo=FALSE, warning=FALSE, message=FALSE, cache=FALSE}
plotQualityProfile(fq[1:2])
```

# Filtering reads

```{r, echo=FALSE, warning=FALSE, message=FALSE, cache=FALSE}
# Place filtered files in filtered/ subdirectory
```

# Learning about error rates

```{r, echo=FALSE, warning=FALSE, message=FALSE, cache=FALSE}
plotErrors(err, nominalQ=TRUE)
```

# Bulding an ASVs table
```{r, echo=FALSE, warning=FALSE, message=FALSE, cache=FALSE}

```



```

seqtab <- makeSequenceTable(dada_obj)
dim(seqtab)
...

# Checking the distribution of sequence lengths
```{r, echo=FALSE, warning=FALSE, message=FALSE, cache=FALSE}
options(max.print="500")
table(nchar(getSequences(seqtab)))

...

# Remove chimeras
```{r, echo=FALSE, warning=FALSE, message=FALSE, cache=FALSE}
seqtab.nochim <- removeBimeraDenovo(seqtab, verbose=TRUE)
dim(seqtab.nochim)
sum(seqtab.nochim)/sum(seqtab)
table(nchar(getSequences(seqtab.nochim)))
...

# Summary of the different steps of the pipeline

```{r, include=FALSE, warning=FALSE, message=FALSE, cache=FALSE}
getN <- function(x) sum(getUniques(x))
track <- cbind(out, sapply(dada_obj, getN), rowSums(seqtab.nochim))

## If processing a single sample, remove the sapply calls: e.g. replace sapply(dadaFs, getN) with
getN(dadaFs)
colnames(track) <- c("input", "filtered", "denoised", "nonchim")
rownames(track) <- sample.names
...

```{r, echo=FALSE, warning=FALSE, message=FALSE, cache=FALSE}
options(max.print="600")
track

...

# Assignment

```{r, include=FALSE, warning=FALSE, message=FALSE, cache=FALSE}
library(stringr)
unite.ref <- "./sh_general_release_dynamic_s_10.05.2021.fasta" # CHANGE ME to location on your
machine
taxa <- assignTaxonomy(seqtab.nochim, unite.ref, multithread = TRUE, tryRC = TRUE)

str_replace_all(taxa, pattern = "k__", replacement = "")
str_replace_all(taxa, pattern = "p__", replacement = "")
str_replace_all(taxa, pattern = "c__", replacement = "")
str_replace_all(taxa, pattern = "o__", replacement = "")

```

```
str_replace_all(taxa, pattern = "f__", replacement = "")
str_replace_all(taxa, pattern = "g__", replacement = "")
str_replace_all(taxa, pattern = "s__", replacement = "")
```

...

Viewing the found assignments :

```
``{r, echo=FALSE, warning=FALSE, message=FALSE, cache=FALSE}
taxa.print <- taxa # Removing sequence rownames for display only
rownames(taxa.print) <- NULL
head(taxa.print)
``
```

# saving the global environment

```
save( out.ee, fq, seqtab, seqtab.nochim, err, track,sample.names, taxa , file = "./assignation
Unite.rda")
```

...
